# Supplementary material for: Development and validation of epithelial mesenchymal transition-related prognostic model for hepatocellular carcinoma
Source: publisher site journal article supplement (doi:10.18632/aging.202976), 2021-04-30
Supplement: Supplementary file [file aging-v13i10-202976-supplementary-material-SD1.pdf]

## SUPPLEMENTARY FIGURES

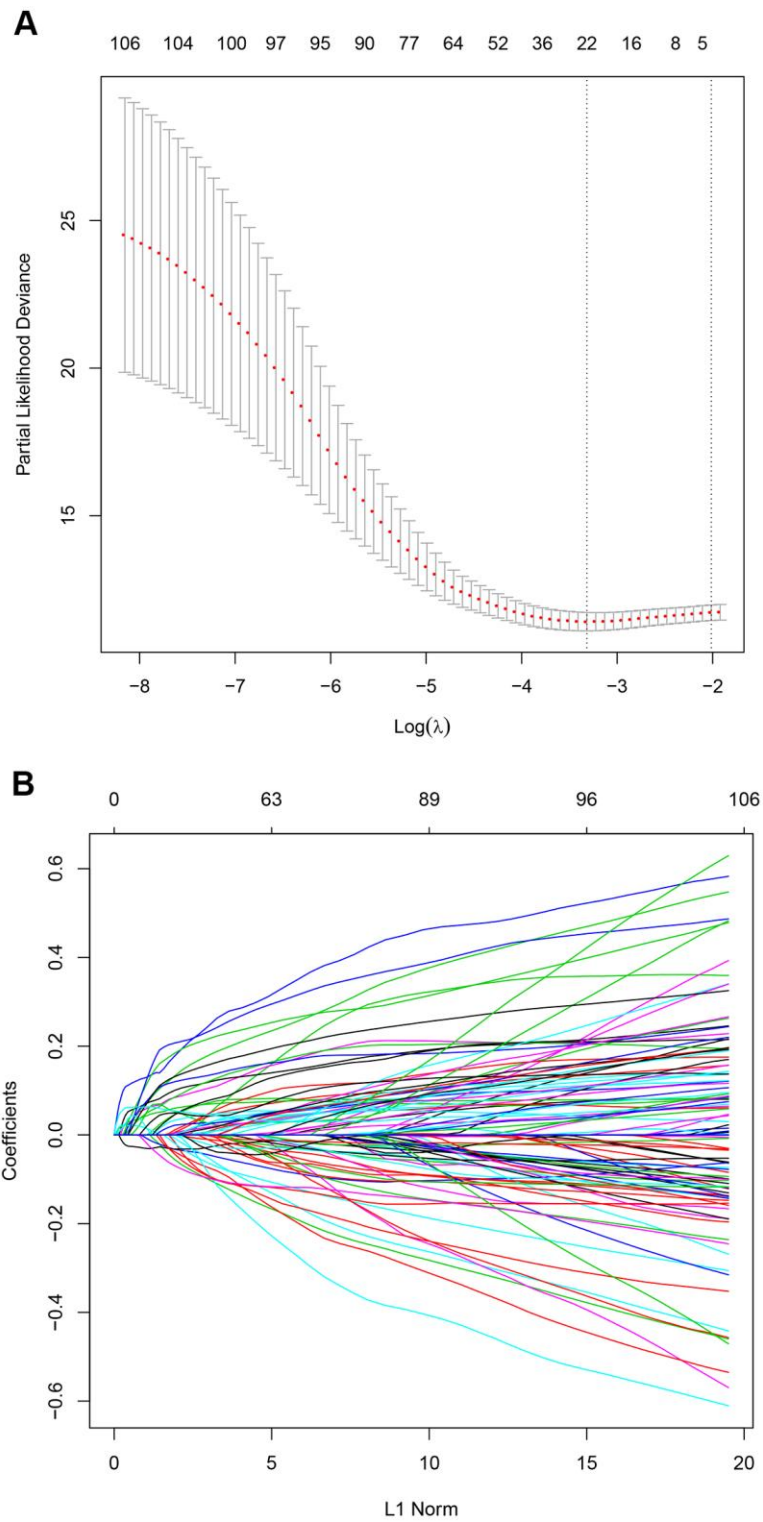

**Supplementary Figure 1. Lasso Cox regression analysis of the OS-related genes.** Cross-validation plot (A) and coefficient against the log-lambda value plot (B) for LASSO.

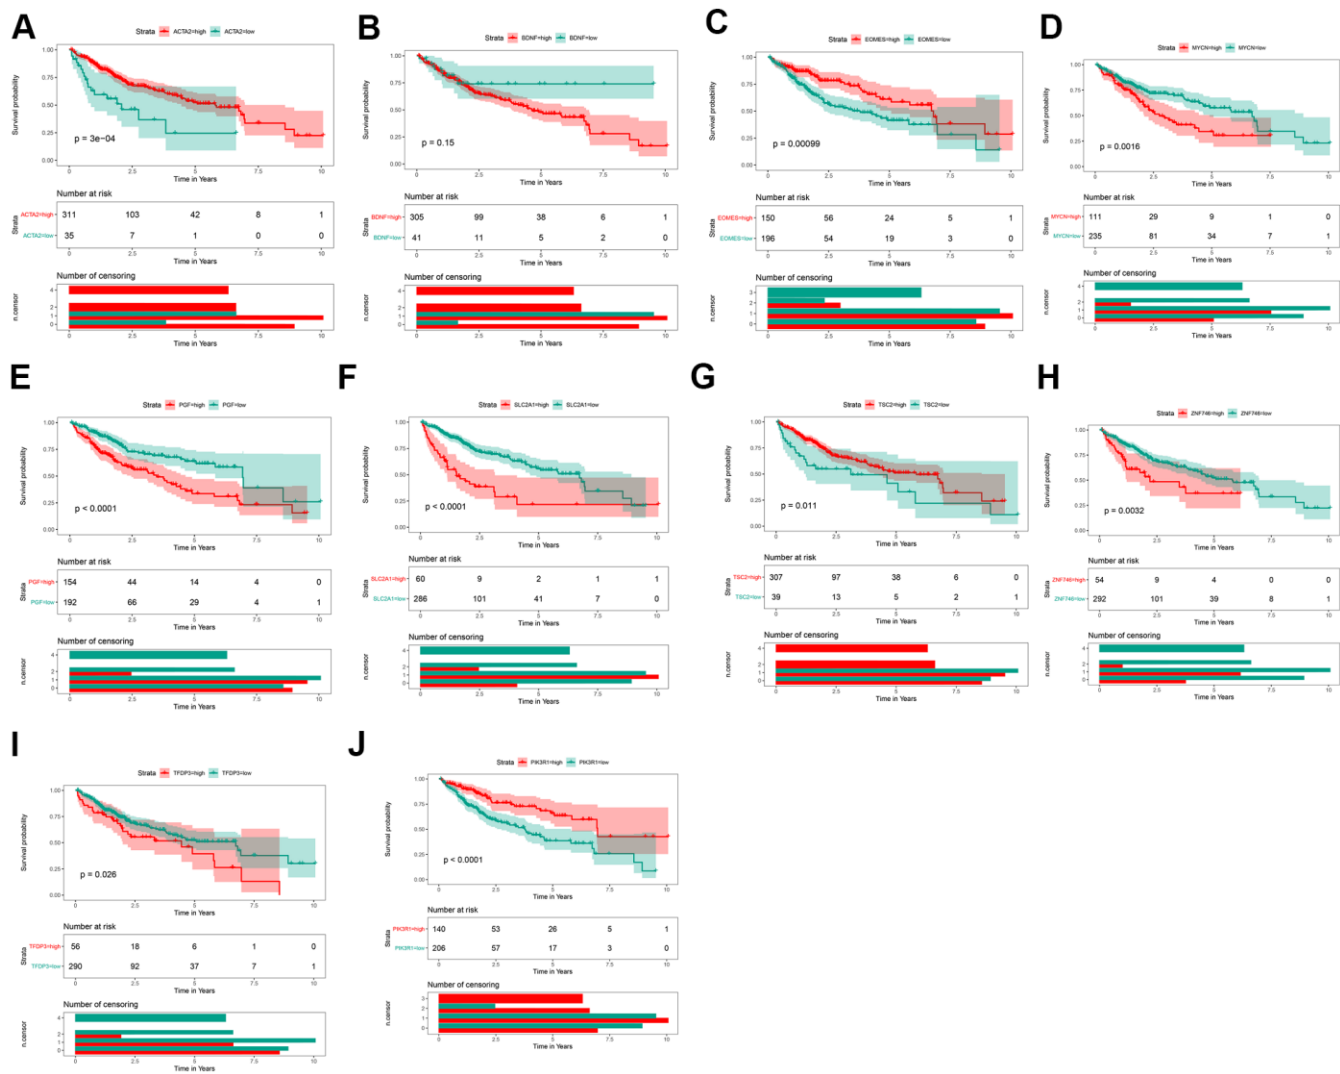

**Supplementary Figure 2. Kaplan-Meier survival curve analysis of the 10 genes.** (A–J) Kaplan-Meier survival curve analysis of ACTA2, BDNF, EOMES, MYCN, PGF, SLC2A1, TSC2, ZNF746, TFD3, and PIK3R1 on HCC patients derived from TCGA LIHC sequencing data respectively.

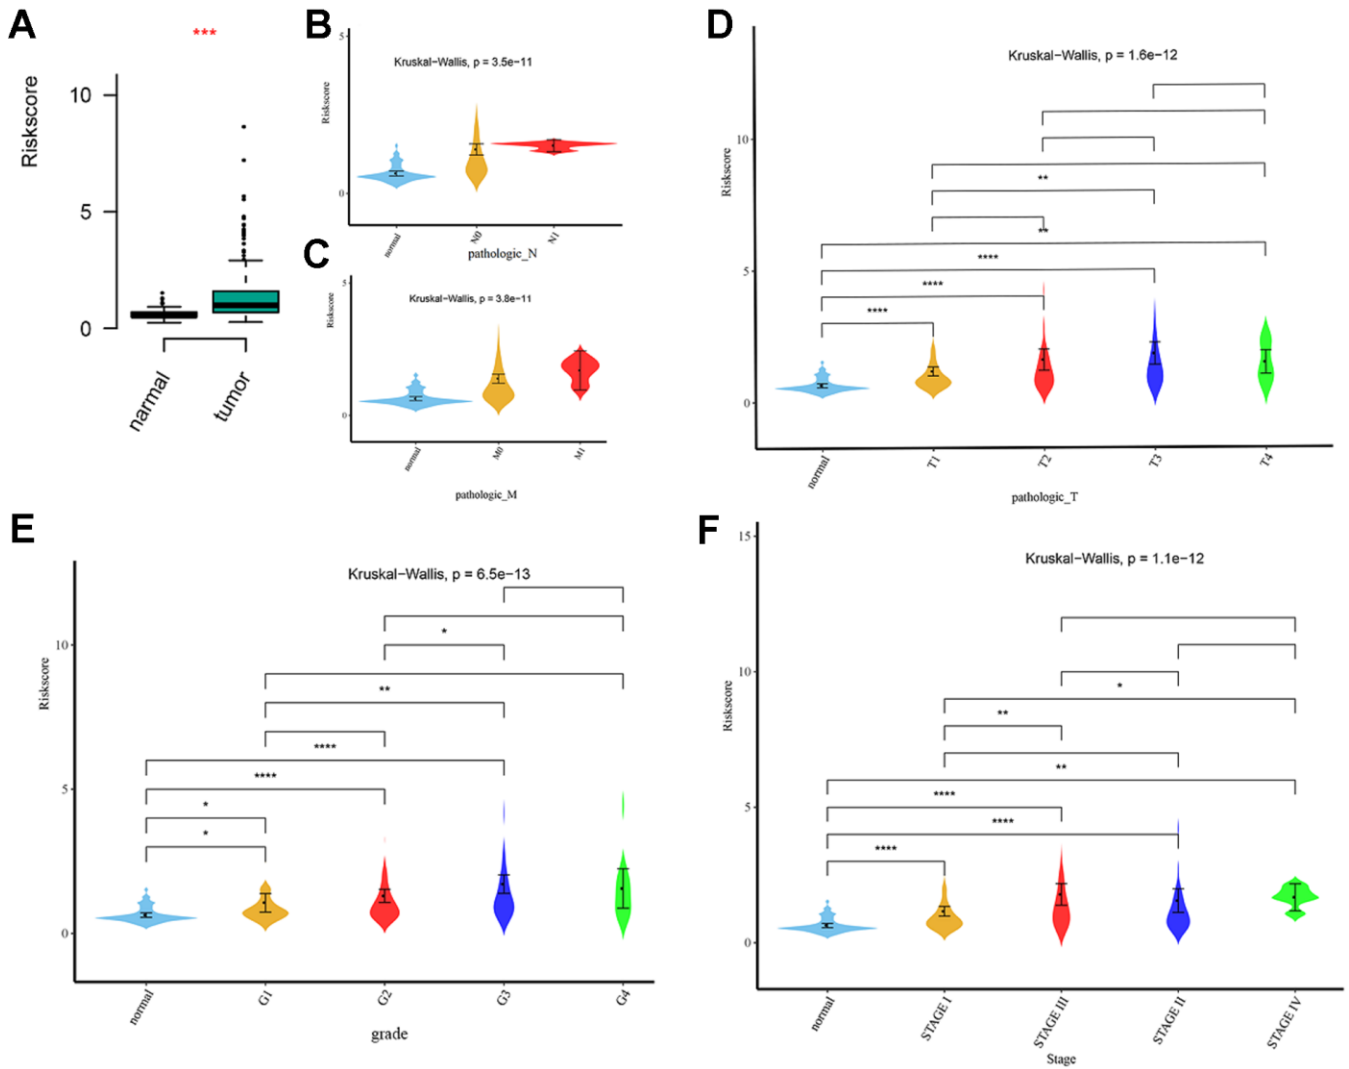

**Supplementary Figure 3. The risk score distinguish between normal and tumor tissues, tumor grade and HCC stage. (A)** Risk score distribution in TCGA-LIHC tumor and normal tissues. **(B–F)** Violin plot comparing the levels and distributions of risk score in different Pathologic N, Pathologic M, Pathologic T, tumor grade, and tumor stage.

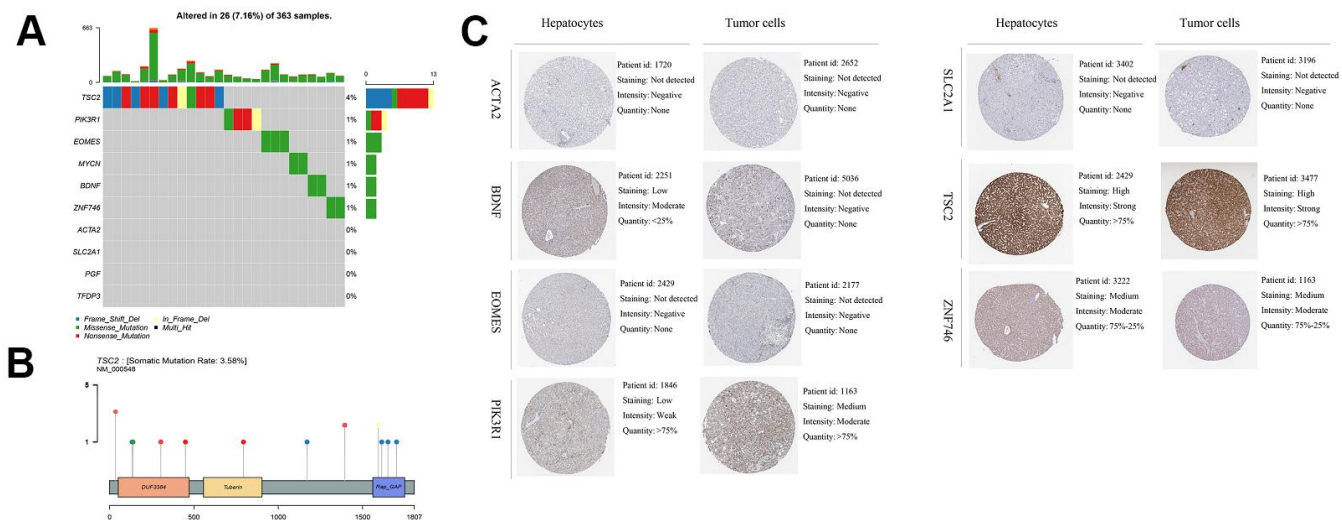

**Supplementary Figure 4. Gene mutation analysis of 6 EMT related genes.** Gene mutation and protein immunohistochemistry analysis of EMT risk related genes in HCC patients. **(A)** Somatic mutation information of 6 EMT related genes analyzed by “TCGA mutations” package. **(B)** Specific somatic mutation sites distribution of TSC2 in HCC patients analyzed by “TCGA mutations” package. **(C)** Immunohistochemistry staining images of ACTA2, BDNF, EOMES, PIK3R1, SLC2A1, TSC2, ZNF746 in HCC tumor tissues and normal tissues from the Human Protein Atlas database.

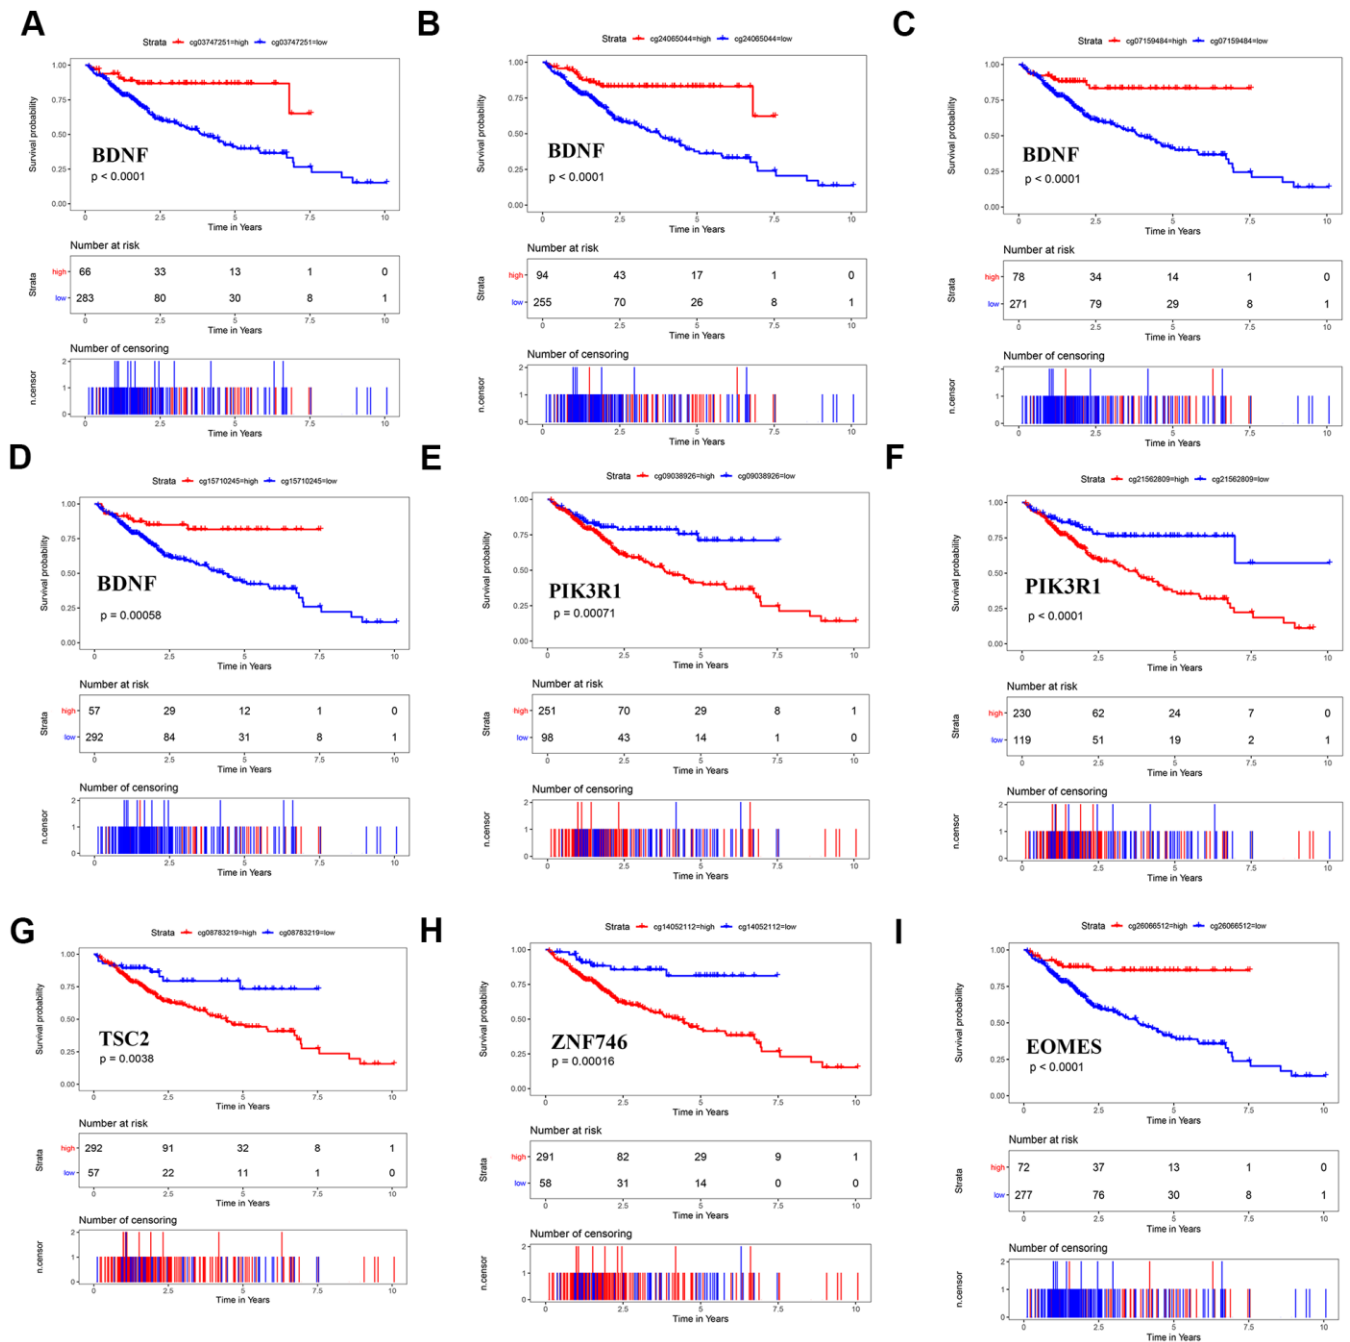

**Supplementary Figure 5. KM survival analysis of methylation sites in BDNF, PIK3R1, TSC2, ZNF746 and EOMES gene.** (A–D) Kaplan-Meier survival curve analysis of four significant OS related BDNF methylation sites derived from TCGA-LIHC DNA methylation data respectively. (E, F) Kaplan-Meier survival curve analysis of two significant OS related PIK3R1, methylation sites derived from TCGA-LIHC DNA methylation data respectively. (G) Kaplan-Meier survival curve analysis of one significant OS related TSC2 methylation sites derived from TCGA-LIHC DNA methylation data. (H) Kaplan-Meier survival curve analysis of one significant OS related ZNF746 methylation sites derived from TCGA-LIHC DNA methylation data. (I) Kaplan-Meier survival curve analysis of one significant OS related EOMES methylation sites derived from TCGA-LIHC DNA methylation data.
